# Supplementary material
Source: Springer Nature journal article supplement (https://www.springermedizin.de/resource/supplementary/12913_2012_2245_MOESM2_ESM.pdf/9530248)
Supplement: MOESM2 [file 9530248]

## Invited

512 patients  
- invited to  
participate  
in the study  
(Oct 2010)

## Consenters

122 patients consented to  
participate, and were sent a  
questionnaire

## 390 Non-consenters

- \* 33 patients died before responding to the invitation
- \* 26 patients uncontactable
- \* 16 patients refused consent
- \* 315 patients did not respond

## Survey Responders

102 (20%) completed  
the questionnaire and  
had hospital admissions  
data which could be  
linked

## 20 Non-respondents

- \* 2 died before completing questionnaire
- \* 6 withdrew
- \* 9 did not respond
- \* 3 completed the survey but their survey data could not be linked to hospital admissions data

## Telephone follow-up

96 patients  
contacted
